# Supplementary material
Source: PubMed Central journal article supplement (PMC11189720)

**Supplementary materials for**  
**Inflammation-related pathology in the olfactory epithelium: its impact on the olfactory system in psychotic disorders**

Kun Yang<sup>1,#</sup>, Ph.D.; Yuto Hasegawa<sup>1,#</sup>, Ph.D.; Janardhan P Bhattarai<sup>2</sup>, Ph.D.; Jun Hua<sup>3,4</sup>, Ph.D.; Milan Dower<sup>5</sup>, BS; Semra Etyemez<sup>1</sup>, MD; Neal Prasad<sup>1</sup>, BS; Lauren Duvall<sup>1</sup>, BS; Adrian Paez<sup>4</sup>, BS; Amy Smith<sup>6</sup>, BS; Yingqi Wang<sup>2</sup>, Ph.D.; Yun-Feng Zhang<sup>2</sup>, Ph.D.; Andrew P. Lane<sup>6</sup>, MD; Koko Ishizuka<sup>1</sup>, MD, Ph.D.; Vidyulata Kamath<sup>1</sup>, Ph.D.; Minghong Ma<sup>2</sup>, Ph.D.; Atsushi Kamiya<sup>1,\*</sup>, MD, Ph.D.; and Akira Sawa<sup>1,5,7,8,9,10,\*</sup>, MD.

<sup>1</sup>Department of Psychiatry, Johns Hopkins University School of Medicine, Baltimore, Maryland.

<sup>2</sup>Department of Neuroscience, University of Pennsylvania Perelman School of Medicine, Philadelphia, Pennsylvania.

<sup>3</sup>Department of Radiology and Radiological Sciences, Johns Hopkins University School of Medicine, Baltimore, Maryland.

<sup>4</sup>F.M. Kirby Research Center for Functional Brain Imaging, Kennedy Krieger Institute, Baltimore, Maryland.

<sup>5</sup>Department of Biomedical Engineering, Johns Hopkins University School of Medicine, Baltimore, Maryland.

<sup>6</sup>Department of Otolaryngology-Head and Neck Surgery, Johns Hopkins University School of Medicine, Baltimore, Maryland.

<sup>7</sup>Department of Neuroscience, Johns Hopkins University School of Medicine, Baltimore, Maryland.

<sup>8</sup>Department of Pharmacology, Johns Hopkins University School of Medicine, Baltimore, Maryland.

<sup>9</sup>Department of Genetic Medicine, Johns Hopkins University School of Medicine, Baltimore, Maryland.

<sup>10</sup>Department of Mental Health, Johns Hopkins Bloomberg School of Public Health, Baltimore, Maryland.

# These authors contributed equally to this work

\* Corresponding authors

Contact author: Akira Sawa ([asawa1@jhmi.edu](mailto:asawa1@jhmi.edu))

**Table S1. Significant genes identified via differential expression analysis between healthy controls and first episode psychosis patients.**

Analysis results from DESeq2. Meaning of columns: baseMean, mean of normalized counts for all samples; log2FoldChange, log2 of fold change; lfcSE, standard error value; stat, Wald statistic; padj, adjusted p-value after multiple comparison correction; #Pubmed, the number of publications which mentioned the gene and the keyword "immune," "inflammation," or "inflammatory" in their titles or abstracts. Nine genes, categorized as immune/ inflammation-related based on the threshold of 20 publications, were highlighted in gray shadow.

| Gene               | baseMean  | log2FoldChange | lfcSE | stat  | pvalue   | padj     | #Pubmed |
|--------------------|-----------|----------------|-------|-------|----------|----------|---------|
| TSLP               | 536.91    | 0.67           | 0.16  | 4.08  | 4.59E-05 | 0.04     | 1673    |
| EGR2               | 630.97    | 1.18           | 0.30  | 3.99  | 6.74E-05 | 0.04     | 259     |
| AOC3               | 97.67     | -1.16          | 0.29  | -3.99 | 6.58E-05 | 0.04     | 174     |
| TRIB3              | 17921.37  | 0.59           | 0.15  | 4.02  | 5.79E-05 | 0.04     | 84      |
| CNTN1              | 298.30    | -1.37          | 0.34  | -4.01 | 6.08E-05 | 0.04     | 57      |
| RBFOX3             | 35.80     | 1.26           | 0.30  | 4.18  | 2.85E-05 | 0.03     | 49      |
| HSPA2              | 309.34    | -1.04          | 0.23  | -4.55 | 5.41E-06 | 0.02     | 44      |
| YWHAE              | 45854.68  | -0.19          | 0.05  | -4.05 | 5.13E-05 | 0.04     | 38      |
| SIK1               | 3754.82   | 0.66           | 0.17  | 4.00  | 6.44E-05 | 0.04     | 28      |
| UBE2V1             | 39412.73  | -0.16          | 0.04  | -4.45 | 8.48E-06 | 0.02     | 18      |
| SOAT2              | 70.71     | -0.94          | 0.21  | -4.44 | 8.84E-06 | 0.02     | 11      |
| EIF4G2             | 132111.40 | -0.13          | 0.03  | -4.31 | 1.66E-05 | 0.03     | 11      |
| PAPPA2             | 1672.11   | 1.14           | 0.28  | 4.02  | 5.90E-05 | 0.04     | 11      |
| KLHDC7B            | 945.63    | 1.03           | 0.26  | 3.91  | 9.11E-05 | 0.05     | 6       |
| DMGDH              | 181.43    | 0.80           | 0.18  | 4.43  | 9.58E-06 | 0.02     | 5       |
| SGCG               | 65.47     | 1.31           | 0.30  | 4.38  | 1.19E-05 | 0.02     | 5       |
| MLLT10             | 3972.80   | 0.17           | 0.04  | 4.27  | 1.92E-05 | 0.03     | 5       |
| ATP6V1C2           | 43.47     | 2.01           | 0.31  | 6.54  | 6.05E-11 | 8.43E-07 | 4       |
| HIST1H3D           | 94.94     | -0.77          | 0.19  | -4.06 | 4.88E-05 | 0.04     | 4       |
| EFHC1              | 1758.49   | 0.27           | 0.07  | 4.02  | 5.85E-05 | 0.04     | 2       |
| TMEM189            | 39412.73  | -0.16          | 0.04  | -4.45 | 8.48E-06 | 0.02     | 1       |
| RTCB               | 16622.00  | -0.10          | 0.02  | -3.99 | 6.68E-05 | 0.04     | 1       |
| TMEM189-<br>UBE2V1 | 39412.73  | -0.16          | 0.04  | -4.45 | 8.48E-06 | 0.02     | 0       |
| GOLGA6L9           | 524.33    | 0.31           | 0.07  | 4.19  | 2.73E-05 | 0.03     | 0       |
| HIST1H2AD          | 94.94     | -0.77          | 0.19  | -4.06 | 4.88E-05 | 0.04     | 0       |
| FAM161B            | 1581.51   | 0.28           | 0.07  | 3.98  | 6.80E-05 | 0.04     | 0       |
| NPIPA5             | 11144.46  | 0.27           | 0.07  | 3.95  | 7.88E-05 | 0.04     | 0       |

**Table S2. Two-group comparison of expression levels of co-expression network modules between first-episode psychosis patients and healthy controls.**

Six modules were identified by the WGCNA method. Among 13,935 genes expressed in olfactory neuronal cells, 8488 were not assigned to any modules.

| <b>module</b> | <b>size</b> | <b>pvalue</b> | <b>padj</b> |
|---------------|-------------|---------------|-------------|
| I             | 124         | 6.24E-05      | 3.74E-04    |
| II            | 223         | 4.96E-03      | 0.01        |
| III           | 89          | 0.34          | 0.65        |
| IV            | 3332        | 0.43          | 0.65        |
| V             | 1319        | 0.59          | 0.70        |
| VI            | 360         | 0.80          | 0.80        |

**Table S3. PubMed search results for genes in module II.**

| gene    | #Pubmed | gene    | #Pubmed | gene    | #Pubmed | gene     | #Pubmed | gene       | #Pubmed | gene    | #Pubmed |
|---------|---------|---------|---------|---------|---------|----------|---------|------------|---------|---------|---------|
| MMP2    | 5237    | FOXO4   | 68      | LPAR6   | 14      | SLC2A4RG | 5       | TPK1       | 2       | PCDHGA2 | 0       |
| VDR     | 1807    | LY6E    | 62      | LY75    | 14      | SMARCC2  | 5       | WDR81      | 2       | PCDHGA3 | 0       |
| JAK1    | 1777    | NFATC4  | 59      | GREM2   | 13      | VPS9D1   | 5       | ZADH2      | 2       | PCDHGA4 | 0       |
| ABCA1   | 1030    | PDGFD   | 57      | OLFML3  | 13      | APBB1    | 4       | ADSSL1     | 1       | PCDHGA5 | 0       |
| MCC     | 1019    | RYK     | 50      | PTPRS   | 13      | CARD17   | 4       | BTBD8      | 1       | PCDHGA6 | 0       |
| ADAM17  | 1008    | ELF1    | 46      | SIAE    | 13      | EXOC4    | 4       | CCDC140    | 1       | PCDHGA7 | 0       |
| IL1R1   | 832     | FOXC2   | 44      | BDH2    | 12      | LZTS2    | 4       | CFAP69     | 1       | PCDHGA8 | 0       |
| IVD     | 733     | TTC7A   | 41      | CD99L2  | 12      | ZGPAT    | 4       | DENND6B    | 1       | PCDHGB3 | 0       |
| CASP1   | 709     | RNASET2 | 37      | FKBP8   | 12      | ADGRL2   | 3       | EMG1       | 1       | PCDHGB4 | 0       |
| STAT2   | 695     | CUX1    | 34      | RPS6KA2 | 11      | ATP9B    | 3       | GTF3C4     | 1       | PCDHGB5 | 0       |
| LAMP1   | 658     | PLXNB2  | 33      | USP33   | 11      | C6orf89  | 3       | KCNK15     | 1       | PCDHGB6 | 0       |
| CD7     | 508     | THRA    | 33      | ALDH3B1 | 10      | CALCOCO1 | 3       | KCNS2      | 1       | PCMTD2  | 0       |
| C1S     | 452     | TRIM8   | 31      | CD302   | 10      | CARD16   | 3       | PCDHGA1    | 1       | RNF149  | 0       |
| NRP1    | 396     | CLCA2   | 10      | CLCA2   | 10      | FAXDC2   | 3       | PCDHGA9    | 1       | SLC9B1  | 0       |
| GRN     | 395     | CTBP1   | 28      | CMTR1   | 9       | HGSNAT   | 3       | PCDHGB1    | 1       | SPATA6  | 0       |
| CASP4   | 389     | RTP4    | 28      | PSD3    | 9       | IPO9     | 3       | PCDHGB2    | 1       | TMCO4   | 0       |
| C1R     | 386     | UBE2L6  | 28      | SLC44A1 | 9       | LRRN4CL  | 3       | PCDHGB7    | 1       | TMEM140 | 0       |
| LRP1    | 384     | DPYD    | 27      | TM9SF4  | 9       | SLC9B2   | 3       | PCDHGC4    | 1       | TSTD3   | 0       |
| IFI16   | 366     | FBLN5   | 27      | VPS39   | 9       | ST6GAL2  | 3       | PCDHGC5    | 1       |         |         |
| LRRK2   | 348     | PTPN13  | 26      | PGAP3   | 8       | STARD5   | 3       | PDZRN3     | 1       |         |         |
| CTSK    | 312     | PLPP3   | 25      | SLC9A9  | 8       | TCTN1    | 3       | PPM1M      | 1       |         |         |
| STK11   | 297     | SIK3    | 25      | LIME1   | 7       | WDR11    | 3       | RBM44      | 1       |         |         |
| DCN     | 271     | TLE1    | 25      | MICU1   | 7       | WDR6     | 3       | RRAGB      | 1       |         |         |
| NR3C1   | 266     | BCAT1   | 24      | NEK9    | 7       | WRNIP1   | 3       | SHISA4     | 1       |         |         |
| ARNT    | 252     | LPCAT2  | 23      | NME7    | 7       | ZER1     | 3       | SPG21      | 1       |         |         |
| FGF7    | 216     | LTBP2   | 22      | RABEP1  | 7       | ANKRD23  | 2       | TBC1D14    | 1       |         |         |
| NMI     | 177     | STAG2   | 22      | ZFR     | 7       | DCAF6    | 2       | WDR91      | 1       |         |         |
| PRKCA   | 163     | TBX3    | 22      | ALPK2   | 6       | EFHC1    | 2       | ABHD15     | 0       |         |         |
| CTSS    | 155     | FOXL1   | 21      | HECW2   | 6       | EVC2     | 2       | ANKRD39    | 0       |         |         |
| NFKBIZ  | 152     | LRRFIP1 | 21      | NIPBL   | 6       | GLT8D2   | 2       | C3orf18    | 0       |         |         |
| ANGPTL2 | 146     | CTPS1   | 20      | RGL1    | 6       | GRAMD4   | 2       | CCDC148    | 0       |         |         |
| CTSA    | 114     | DCTD    | 20      | SELIL3  | 6       | MIER1    | 2       | CDC26      | 0       |         |         |
| JCHAIN  | 106     | PTPRG   | 18      | SH3BP4  | 6       | NXPE3    | 2       | CTDSP2     | 0       |         |         |
| TMEM119 | 103     | SNX9    | 18      | TBC1D5  | 6       | P4HTM    | 2       | DISP2      | 0       |         |         |
| SATB1   | 101     | SVEP1   | 18      | TOB2    | 6       | PCDHGC3  | 2       | GCC1       | 0       |         |         |
| SLIT2   | 100     | SECTM1  | 17      | VPS11   | 6       | PLEKHA6  | 2       | LY75-CD302 | 0       |         |         |
| ATF1    | 89      | TRPS1   | 17      | ZDHHC1  | 6       | RAD9B    | 2       | MEIOC      | 0       |         |         |
| CLMP    | 89      | INPP4B  | 16      | BCAS3   | 5       | RBM43    | 2       | NIPAL2     | 0       |         |         |
| SOCS5   | 89      | MXRA8   | 15      | DDX60L  | 5       | TBC1D17  | 2       | PCDHGA10   | 0       |         |         |
| PBX1    | 85      | AK3     | 14      | IFT140  | 5       | TJAP1    | 2       | PCDHGA11   | 0       |         |         |
| DTNB    | 79      | C1RL    | 14      | RAPGEF2 | 5       | TMEM98   | 2       | PCDHGA12   | 0       |         |         |

## Figure legends

### Figure S1. No effect of chronic OE inflammation on body weight, locomotion, and anxiety.

(A) Body weight. Control, n=9 (4 males, 5 females); IOI, n=7 (4 males, 3 females)

(B) Locomotion (left), percentage of time spent in central area (right) as indicated by the open field test. Control, n=9 (4 males, 5 females); IOI, n=7 (4 males, 3 females).

(C) The percentage of entries into the open arm as indicated by the elevated plus maze test.

Control, n=19 (9 males, 10 females); IOI, n=17 (8 males, 9 females)

Data are presented as the mean  $\pm$  s.e.m.

**Figure S1.**

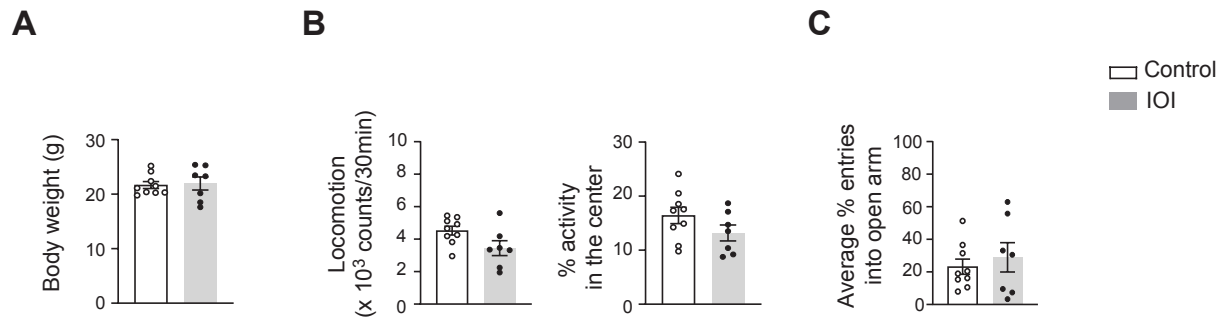

Supplement: NIHMS2001673-supplement-Supplementary_Material.pdf [file NIHMS2001673-supplement-Supplementary_Material.pdf]
